# Supplementary material
Source: PubMed Central journal article supplement (PMC5047036)
Supplement: supp_WNL.0000000000003165_Supplementary_Table_e-1.pdf [file supp_WNL.0000000000003165_Supplementary_Table_e-1.pdf]

Supplementary Table e-1. Performance on memory and visuospatial tests

|                                                     | All PPA, (n=19)               | PPA-L (n=13)                  | PPA-G (n=6)                  |
|-----------------------------------------------------|-------------------------------|-------------------------------|------------------------------|
|                                                     | Mean (SD)                     | Mean (SD)                     | Mean (SD)                    |
| Rivermead Behavioral Memory Test (max=10)           | 9.8±0.6 <sup>a</sup>          | 9.8±0.6 <sup>b</sup>          | 9.8±0.4 <sup>c</sup>         |
| 3 Words 3 Shapes-Non-verbal delayed recall (max=15) | 14.7±0.7 <sup>d</sup>         | 15.0±0 <sup>e</sup>           | 14.3±1.2 <sup>f</sup>        |
| Benton Facial Recognition <sup>g</sup> (max=54)     | 46.4±3.1 <sup>h</sup>         | 46.4±2.5 <sup>i</sup>         | 46.6±4.7 <sup>j</sup>        |
| CERAD Constructions <sup>k</sup> (max=11)           | 9.8±1.2                       | 9.7±1.3                       | 10.2±0.8                     |
| CDR Memory <sup>l</sup>                             | CDR 0 (n=15)<br>CDR 0.5 (n=4) | CDR 0 (n=11)<br>CDR 0.5 (n=2) | CDR 0 (n=4)<br>CDR 0.5 (n=2) |

<sup>a-f, h-j</sup>Measure obtained on: <sup>a</sup>15 participants, <sup>b</sup>10 participants, <sup>c</sup>5 participants, <sup>d</sup>9 participants, <sup>e</sup>6 participants, <sup>f</sup>3 participants, <sup>h</sup>18 participants, <sup>i</sup>13 participants, <sup>j</sup>5 participants. <sup>g</sup>Score based on the Corrected Long Form Score; <sup>k</sup>CERAD: Consortium to Establish a Registry for Alzheimer's Disease; <sup>l</sup>CDR Memory Scores, 0 = None: No memory loss or slight inconsistent forgetfulness; 0.5 = Questionable: Consistent slight forgetfulness; partial recollection of events; "benign" forgetfulness
